# Supplementary material
Source: Springer Nature journal article supplement (https://www.springermedizin.de/resource/supplementary/13034_2010_129_MOESM1_ESM.pdf/9652378)
Supplement: MOESM1 [file 9652378]

## Subjects

### 7. How much do you like schoolwork?

|                          |                          |                          |                          |                          |
|--------------------------|--------------------------|--------------------------|--------------------------|--------------------------|
| not at all               | not much                 | so-so                    | fine                     | very much                |
| <input type="checkbox"/> |

### 8. Do you have problems with any of these subjects:

|                            | no<br>problems           | some<br>problems         | quite a few<br>problems  | lots of<br>problems      |
|----------------------------|--------------------------|--------------------------|--------------------------|--------------------------|
| reading                    | <input type="checkbox"/> | <input type="checkbox"/> | <input type="checkbox"/> | <input type="checkbox"/> |
| writing                    | <input type="checkbox"/> | <input type="checkbox"/> | <input type="checkbox"/> | <input type="checkbox"/> |
| mathematics                | <input type="checkbox"/> | <input type="checkbox"/> | <input type="checkbox"/> | <input type="checkbox"/> |
| foreign language (English) | <input type="checkbox"/> | <input type="checkbox"/> | <input type="checkbox"/> | <input type="checkbox"/> |
| P.E.                       | <input type="checkbox"/> | <input type="checkbox"/> | <input type="checkbox"/> | <input type="checkbox"/> |

### 9. Do you feel that you get all the help that you need:

|                      |                          |                          |                          |                          |                          |
|----------------------|--------------------------|--------------------------|--------------------------|--------------------------|--------------------------|
|                      | no, never                | seldom                   | sometimes                | usually                  | yes, always              |
| at school (in class) | <input type="checkbox"/> |
| with homework        | <input type="checkbox"/> |

### 10. Do you find the necessary peace to work well:

|                      |                          |                          |                          |                          |                          |
|----------------------|--------------------------|--------------------------|--------------------------|--------------------------|--------------------------|
|                      | no, never                | seldom                   | sometimes                | usually                  | yes, always              |
| at school (in class) | <input type="checkbox"/> |
| with homework        | <input type="checkbox"/> |

### 11. How pleased are you with your own work:

|                      |                          |                          |                          |                          |                          |
|----------------------|--------------------------|--------------------------|--------------------------|--------------------------|--------------------------|
|                      | not at all               | not much                 | so-so                    | fine                     | very much                |
| at school (in class) | <input type="checkbox"/> |
| with homework        | <input type="checkbox"/> |

## Loneliness

### 12. What does it mean to be lonely?
